# Supplementary material for: A ligand strategy retarding monovalent copper oxidation toward achieving Cs3Cu2I5 perovskite emitters with enhanced stability for lighting
Source: Royal Society of Chemistry journal article supplement (doi:10.1039/d3nr04347a), 2023-01-01
Supplement: d3nr04347a1.pdf [file d3nr04347a1.pdf]

## Supporting Information

# Ligand strategy retarding monovalent copper oxidation toward achieving Cs<sub>3</sub>Cu<sub>2</sub>I<sub>5</sub> perovskite emitter with enhanced stability for lightings

*Wenxuan Fan<sup>a</sup>, Kaishuai Zhang<sup>a</sup>, Shalong Wang<sup>a</sup>, Leimeng Xu<sup>a\*</sup>, Yingliang Liu<sup>b\*</sup>,*

*Jizhong Song<sup>a\*</sup>*

<sup>a</sup> Key Laboratory of Materials Physics of Ministry of Education, School of Physics and Microelectronics, Zhengzhou University, Daxue Road 75, Zhengzhou 450052, China.

<sup>b</sup> School of Materials Science and Engineering, Zhengzhou University, Daxue Road 75, Zhengzhou 450052, China.

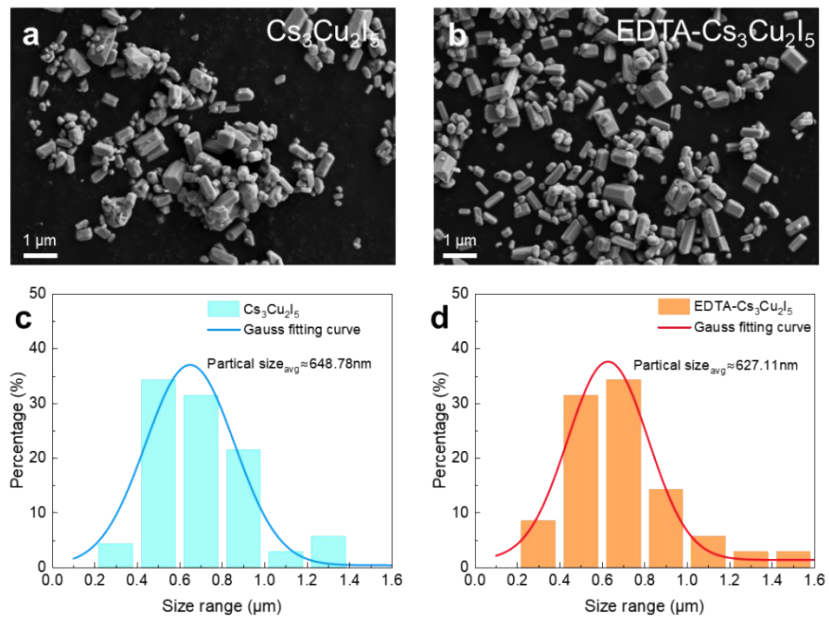

**Figure S1** The SEM images of (a) pure and (b)  $\text{EDTA-Cs}_3\text{Cu}_2\text{I}_5$ . Particle size distribution histograms (c) pure and (d)  $\text{EDTA-Cs}_3\text{Cu}_2\text{I}_5$ .

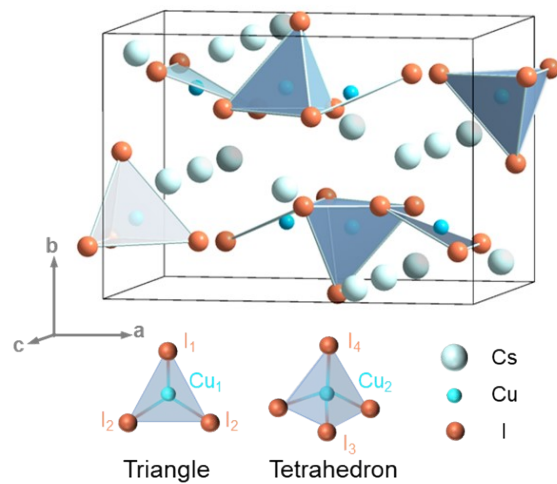

**Figure S2** The crystal structure of  $\text{Cs}_3\text{Cu}_2\text{I}_5$ .

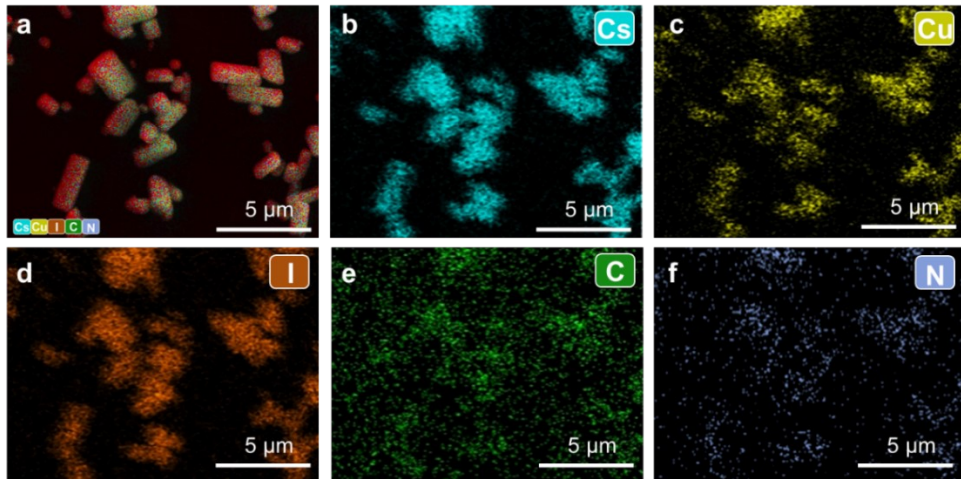

**Figure S3** (a-f) EDS elemental mapping images of Cs, Cu, I, C and N of Cs<sub>3</sub>Cu<sub>2</sub>I<sub>5</sub> powder.

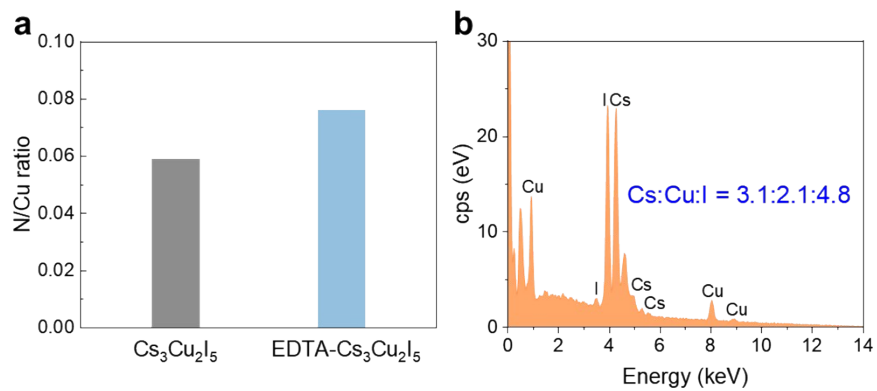

**Figure S4** (a) The N/Cu ratio of  $\text{Cs}_3\text{Cu}_2\text{I}_5$  and EDTA- $\text{Cs}_3\text{Cu}_2\text{I}_5$  samples. (b) The atomic ratio of EDTA- $\text{Cs}_3\text{Cu}_2\text{I}_5$  tested by EDS semiquantitative analysis.

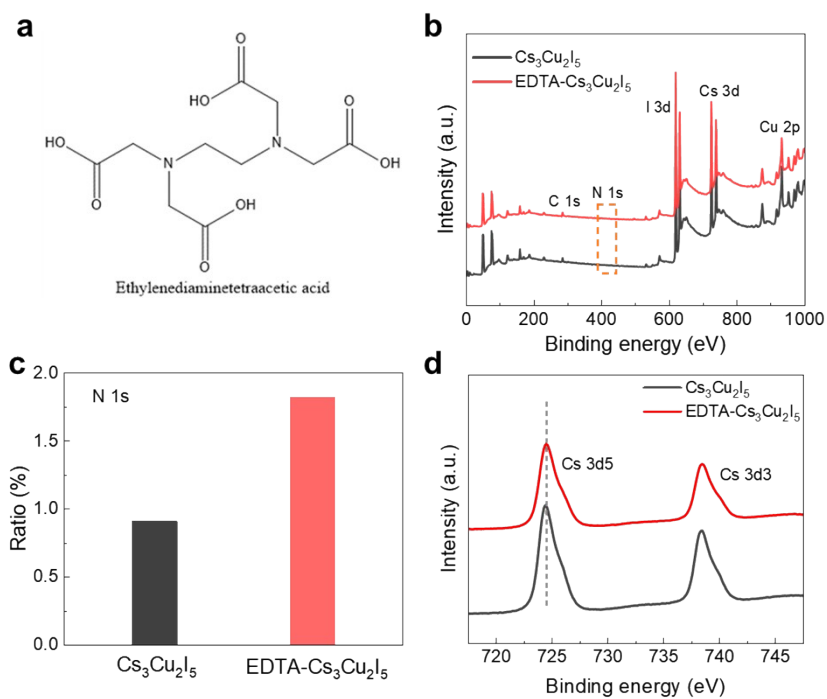

**Figure S5** (a) The structural of EDTA. (b) X-ray photoelectron spectra (XPS) of  $\text{Cs}_3\text{Cu}_2\text{I}_5$  and EDTA- $\text{Cs}_3\text{Cu}_2\text{I}_5$ . (c) The N ratio of  $\text{Cs}_3\text{Cu}_2\text{I}_5$  and EDTA- $\text{Cs}_3\text{Cu}_2\text{I}_5$ . (d) XPS spectra of Cs 3d.

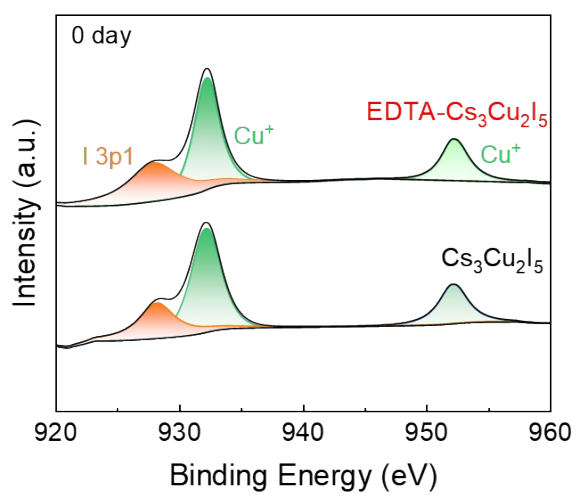

**Figure S6** XPS Cu 2p spectra of pure and EDTA-treated samples.

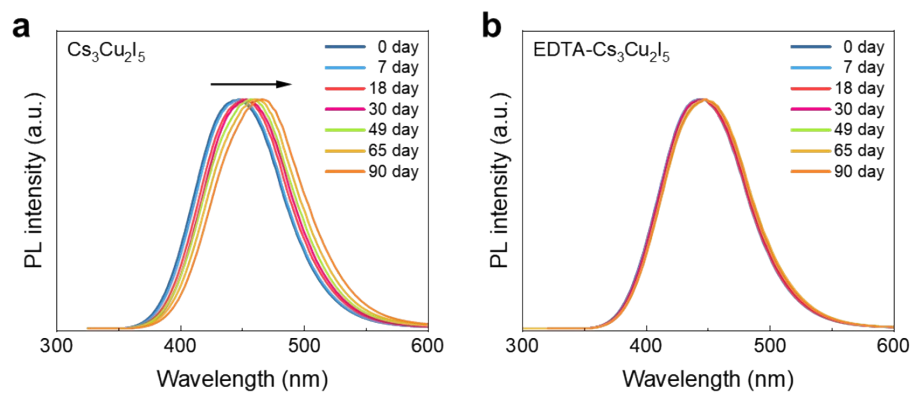

**Figure S7** The PL spectra of (a)  $\text{Cs}_3\text{Cu}_2\text{I}_5$  and (b)  $\text{EDTA-Cs}_3\text{Cu}_2\text{I}_5$  at different storage periods in air ambient.



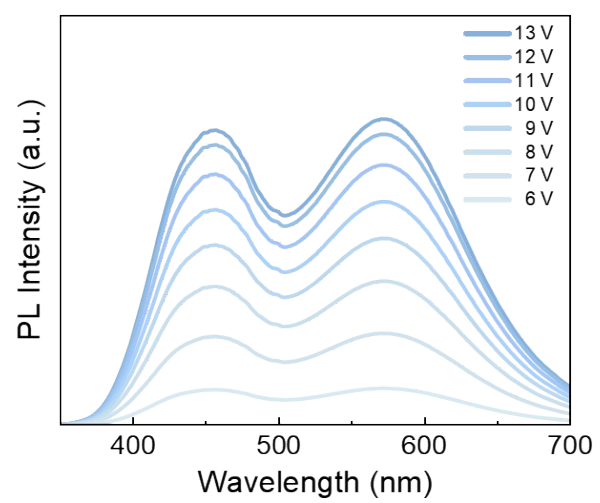

**Figure S8** The PL spectra of EDTA-Cs<sub>3</sub>Cu<sub>2</sub>I<sub>5</sub>-LED device under different driving voltage.

**Table S1** Time-resolved PL decay curves of the pure and EDTA-treated Cs<sub>3</sub>Cu<sub>2</sub>I<sub>5</sub> samples.

| <b>Sample</b>                                       | <b>A<sub>1</sub></b> | <b>τ<sub>1</sub> (ns)</b> | <b>A<sub>2</sub></b> | <b>τ<sub>2</sub> (ns)</b> | <b>τ<sub>avg</sub> (ns)</b> |
|-----------------------------------------------------|----------------------|---------------------------|----------------------|---------------------------|-----------------------------|
| Cs <sub>3</sub> Cu <sub>2</sub> I <sub>5</sub>      | 511                  | 637                       | 2586                 | 1289                      | 1230                        |
| EDTA-Cs <sub>3</sub> Cu <sub>2</sub> I <sub>5</sub> | 457                  | 406                       | 2528                 | 1089                      | 1045                        |
